# Supplementary material for: Capillary flow and mechanical buckling in a growing annular bacterial colony
Source: Royal Society of Chemistry journal article supplement (doi:10.1039/c7sm01452j), 2017-12-08
Supplement: c7sm01452j1.pdf [file c7sm01452j1.pdf]

# Capillary flow and mechanical buckling in a growing annular bacterial colony

Tieyan Si<sup>1,2</sup>, Zidong Ma<sup>2</sup>, Jay X. Tang<sup>\*,2</sup>

<sup>1</sup>Harbin Institute of Technology, Harbin, China

<sup>2</sup>Brown University, Providence, Rhode Island, United States

\* Corresponding author: [jay\\_tang@brown.edu](mailto:jay_tang@brown.edu)

## Supplemental Figures

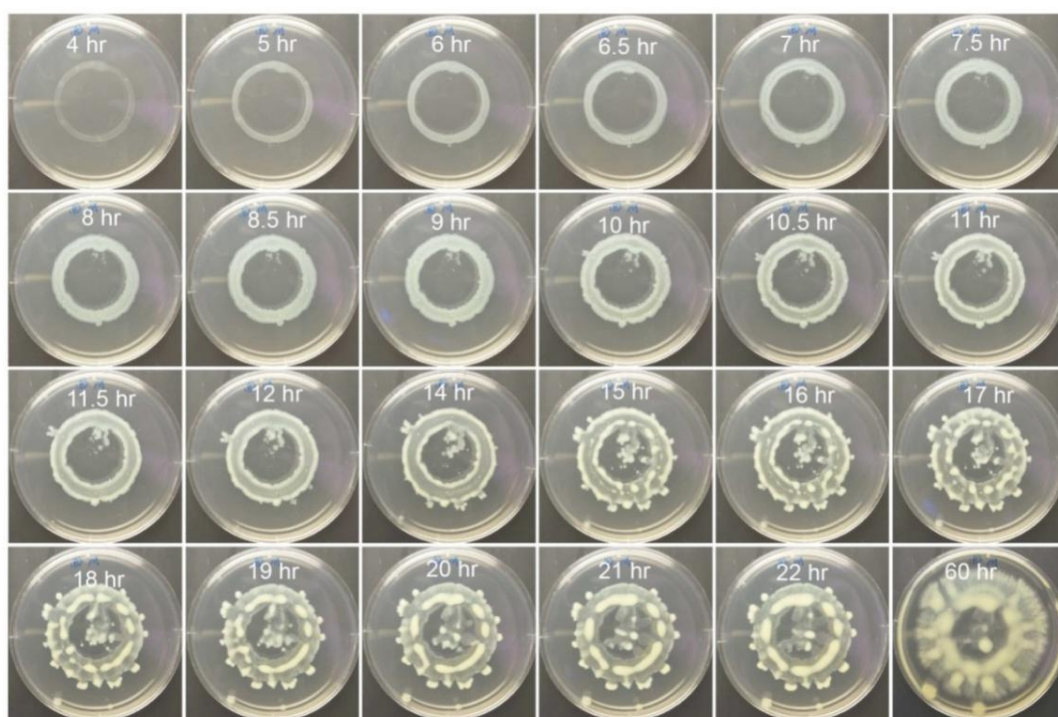

**Figure. S1.** The pattern evolution of a bacterial colony inoculated as a 4 cm diameter lus. Note regularly distributed buckles along the inner edge 9-12 hours after the inoculation. The inward migrating inner ring suddenly reversed its movement to expand out within the 14-15 hour window. At the same time, the continuous arc broke into isolated droplets. The diameter of the petri dish is 9 cm, as it holds for subsequent figures.

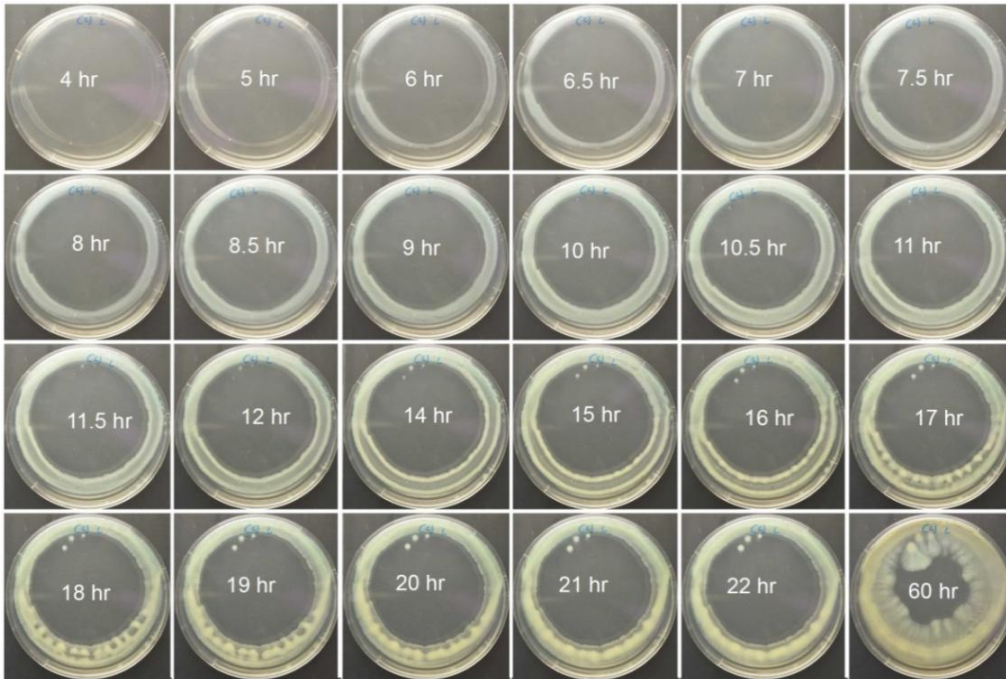

**Figure. S2.** The pattern evolution of a bacterial colony inoculated as a 7.5 cm diameter annulus. Regularly distributed droplets occurred along the inner edge by 17 of growth. Small fingerlike protrusions grew out of the inner edge in the later swelling process after 22 hours.

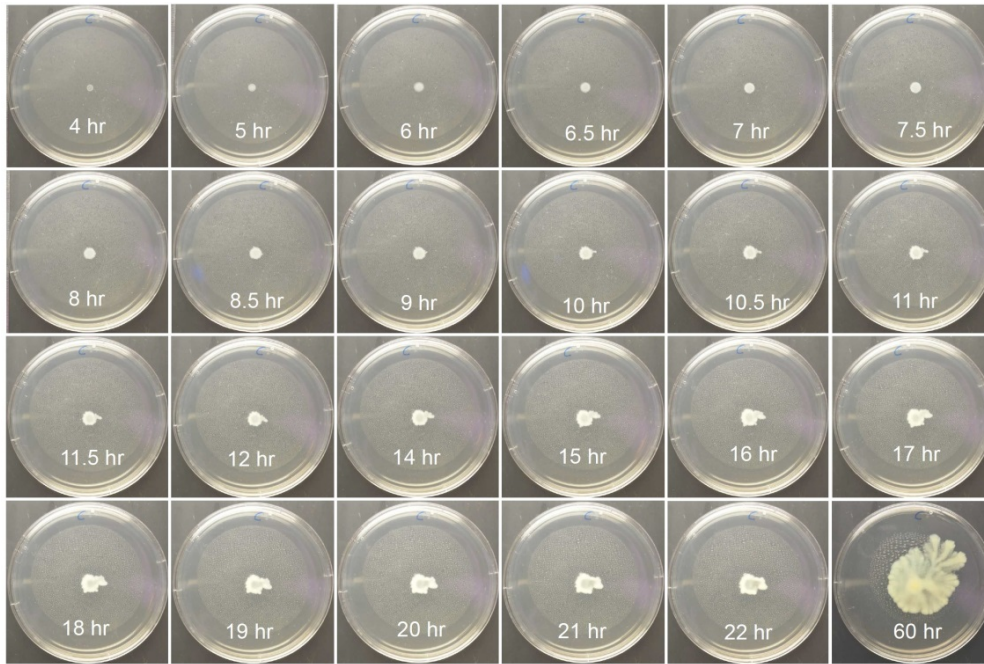

**Figure S3.** The pattern evolution of a *P. aeruginosa* colony inoculated as a point source at the center of the plate. Note a layer of tiny water droplets condensed on the cover. The growth rate of this bacteria colony is rather slow compared with other published experiments on bacterial swarming out of point inoculation [1, 2]. The annular colony growth experiments in this report were performed at a slow growth condition.

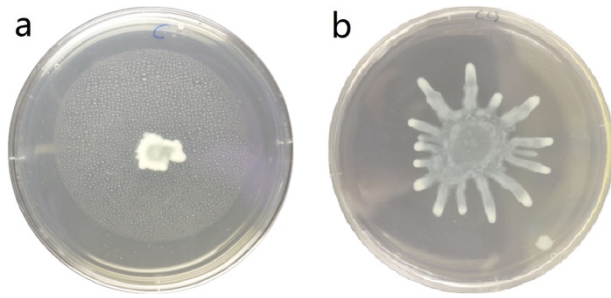

**Figure S4.** A slow-expanding colony and a faster-expanding colony, both originated a point at the plate center. (a) A slowly growing bacterial colony photographed at 23 h. This plate was prepared under the same condition as for the annular swarm observation. Note a layer of water droplets condensed on the cover. (b) A faster-growing bacterial colony photographed at 23 hours in another experiment, with shorter time of drying to allow for agar gelation prior to inoculation (45 min vs 60 min).
